# Supplementary material
Source: PubMed Central journal article supplement (PMC2580753)

## SUPPORTING INFORMATION

### Analysis of IgA1 *N*-glycosylation and its contribution to Fc $\alpha$ RI binding

Michelle M. Gomes, Stephanie B. Wall, Kazuo Takahashi, Jan Novak, Matthew B. Renfrow, and Andrew B. Herr

#### Experimental Procedures

*Enzymatic removal of IgA1 N-glycans for FT-ICR MS analysis*—*N*-glycans were released by treatment with PNGase F as previously described (1) with modifications. The reaction was optimized for release of *N*-glycans from 100  $\mu$ g of IgA1 with denatured protein per manufacturer's protocol for glycerol-free PNGase F (New England Biolabs). The reaction was incubated for 28 h at 37° C and glycan removal was verified by monitoring the shift in migration of IgA1 heavy chain on SDS-PAGE under reducing conditions. Released IgA1 *N*-glycans were analyzed by use of a hybrid linear quadrupole ion trap FT-ICR mass spectrometer (LTQ FT MS, Thermo Electron). A Triversa NanoMate was used as the source of electrospray ions. Individual candidate IgA1 *N*-glycans were confirmed by use of collision induced dissociation (CID) in the LTQ and detection of fragment ions in either the ion trap or FT-ICR cell. All identified PNGase F-released IgA1 *N*-glycans were observed with mass accuracies  $\leq 4$  ppm.

#### Reference

1. Moore, J. S., Wu, X., Kulhavy, R., Tomana, M., Novak, J., Moldoveanu, Z., Brown, R., Goepfert, P. A., and Mestecky, J. (2005) *AIDS* **19**, 381-389

#### Figure Legends

**Figure S1: PNGase F-released *N*-glycans.** NanoMate ESI FT-ICR mass spectrum of PNGase F-released IgA1 *N*-glycans from mIgA1 $\kappa$ . The identified series of *N*-glycans were compared to the identified IgA1 tailpiece *N*-glycopeptides to identify putative C<sub>H</sub>2 domain *N*-glycans. All PNGase F-removed *N*-glycans identified in both mIgA1 $\kappa$  and mIgA1 $\lambda$  analysis were calculated as potential N459 *N*-glycans. Those that were not observed in the IgA1 *N*-glycopeptide LC FT-ICR MS analysis were assigned as C<sub>H</sub>2 *N*-glycans.

**Figure S2: Representative structural analysis of a triantennary IgA1 *N*-glycan.** The LTQ MS/MS spectrum of PNGase F-released mIgA1 $\lambda$  *N*-glycans demonstrates the structural analysis of a triantennary mIgA1 $\lambda$  *N*-glycan (observed as an *N*-glycopeptide in figure 6A), similar to that shown in Figure 4B. The precursor mass in the FT-ICR MS spectrum (not shown) corresponded to the IgA1 *N*-glycan [(NeuAc)<sub>1</sub>(Gal)<sub>2</sub>(GlcNAc)<sub>3</sub>(Man)<sub>3</sub>(GlcNAc)<sub>2</sub>]<sup>2+</sup>. Nomenclature for the monosaccharides is the same as in Figure 4.

**TABLE S1****Sedimentation coefficients of the species observed in IgA1 samples**

Data was analyzed using the c(s) analysis routine in the program Sedfit.

| Sample              | Monomer<br>(Svedberg) | Dimer<br>(Svedberg) | Trimer<br>(Svedberg) | Polymer or high MW aggregate<br>(Svedberg) |
|---------------------|-----------------------|---------------------|----------------------|--------------------------------------------|
| IgA1 $\kappa$       | 6.2 $\pm$ 0.3         | 9.1 $\pm$ 0.5       | 12.2 $\pm$ 0.6       | 19.7 $\pm$ 0.2                             |
| IgA1 $\lambda$      | 6.1 $\pm$ 0.3         | 9.2 $\pm$ 0.3       | 11.6 $\pm$ 0.4       | 19.9 $\pm$ 0.4                             |
| IgA1 <sub>Mcc</sub> | 6.3 $\pm$ 0.2         | 9.5 $\pm$ 0.3       | 12.3 $\pm$ 0.5       | 15.5 $\pm$ 0.7, 19.9 $\pm$ 0.1             |

**Figure S1.**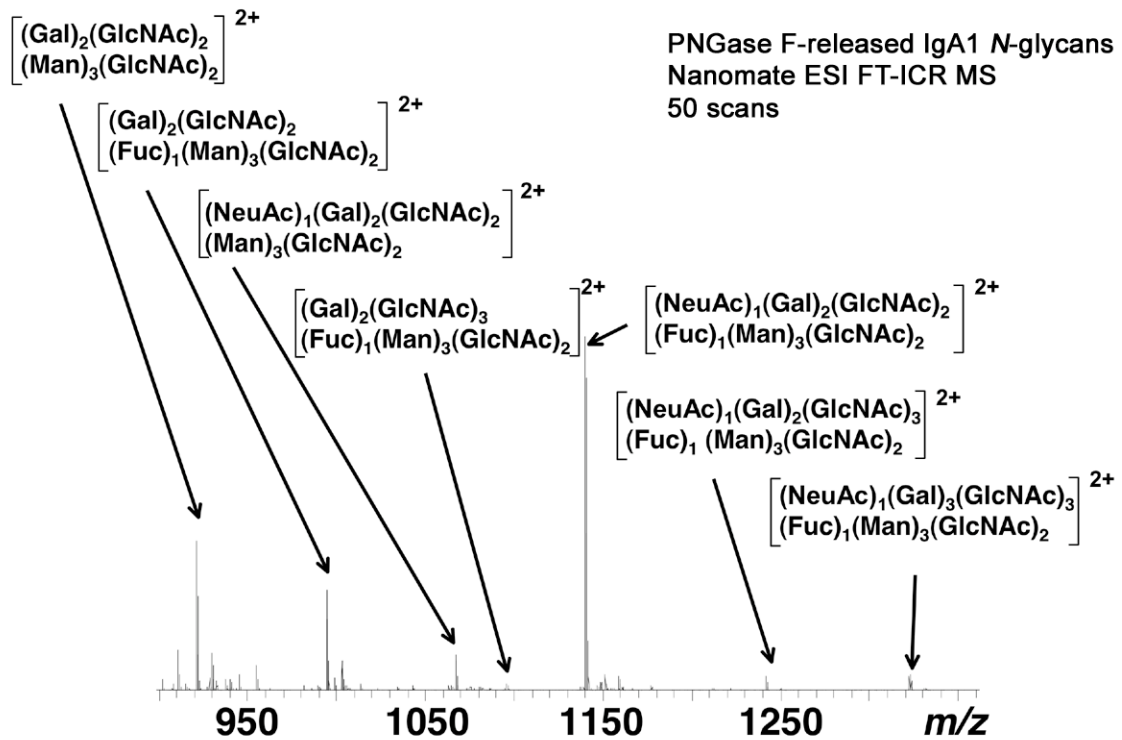

Figure S2.

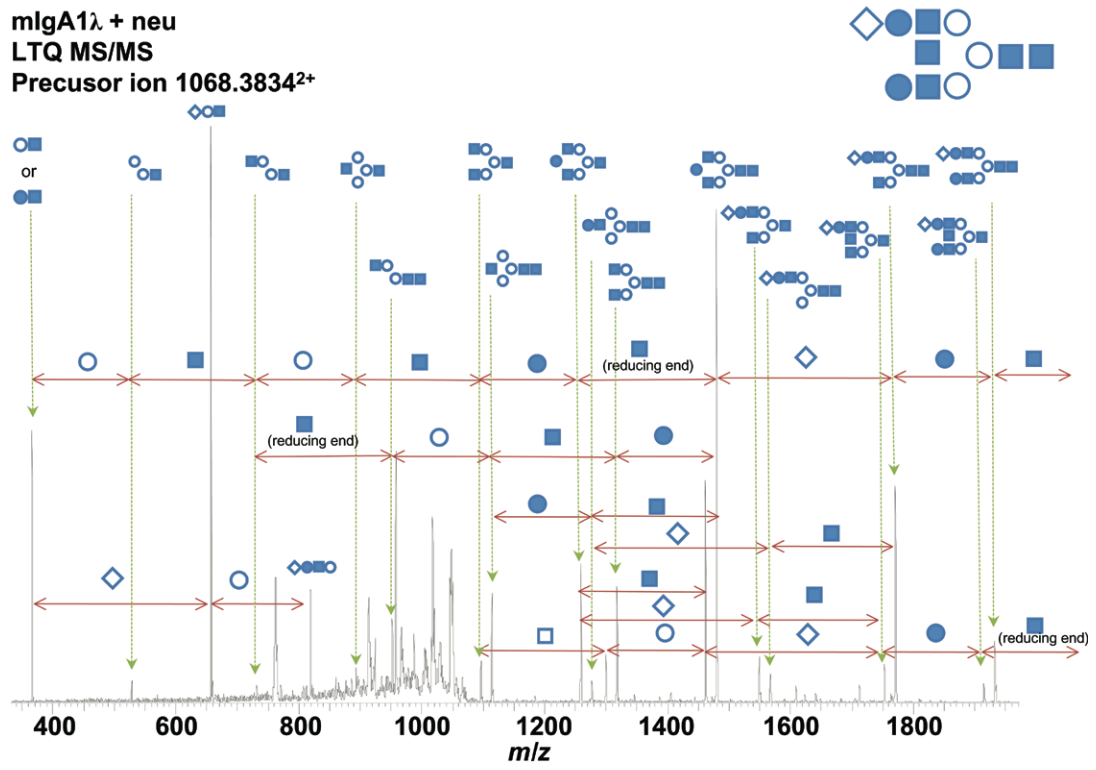

Supplement: NIHMS72211-supplement-Gomes_SuppInfo.pdf [file NIHMS72211-supplement-Gomes_SuppInfo.pdf]
